1 **Validation of an RNase H2 activity assay suitable for clinical screening**

2

3 Marian Schulz<sup>1,2</sup>, Claudia Günther<sup>3</sup>, Rayk Behrendt<sup>1,4</sup>, Axel Roers<sup>1,5</sup>

4 1 Institute for Immunology, Medical Faculty Carl Gustav Carus, TU Dresden, Dresden,  
5 Germany

6 2 University Hospital for Children and Adolescents, University of Leipzig, Leipzig, Germany

7 3 Department of Dermatology, University Hospital Dresden, TU Dresden, Germany

8 4 Institute of Clinical Chemistry and Clinical Pharmacology, University Hospital Bonn,  
9 Germany

10 5Institute for Immunology, University Hospital Heidelberg, Heidelberg, Germany

11

12 *Corresponding authors:* Axel Roers, [axel.roers@tu-dresden.de](mailto:axel.roers@tu-dresden.de);

13 Marian Schulz, [marian.s.schulz@gmail.com](mailto:marian.s.schulz@gmail.com)

14 *Number of text pages:* **33**

15 *Number of tables:* **2**

16 *Number of figures:* **7**

17 *Number of supplemental tables:* **1**

18 *Number of supplemental figures:* **2**

19 *Grant numbers, funding:* Funded by Deutsche Forschungsgemeinschaft (DFG, German  
20 Research Foundation) – Project-ID 369799452 – TRR237 project B17 to A.R., project B19 to  
21 R.B. and project B20 to C.G.; and by Else Kröner-Fresenius-Stiftung Grant 060\_380627 to  
22 M.S.

23

24 *Financial Disclosure and Conflicts of Interest:* The authors declare that there are no conflicts  
25 of interests.

26 **Abstract**

27 As the key enzyme mediating ribonucleotide excision repair, RNase H2 is essential for the  
28 removal of single ribonucleotides from DNA in order to prevent genome damage. Loss of  
29 RNase H2 activity directly contributes to the pathogenesis of autoinflammatory and  
30 autoimmune diseases and might further play a role in ageing and neurodegeneration.  
31 Moreover, RNase H2 activity is a potential diagnostic and prognostic marker in several types  
32 of cancer. Until today, no method for quantification of RNase H2 activity has been validated  
33 for the clinical setting. Herein, validation and benchmarks of a FRET-based whole-cell lysate  
34 RNase H2 activity assay are presented, including standard conditions and procedures to  
35 calculate standardized RNase H2 activity. Spanning a wide working range, the assay is  
36 applicable to various human cell or tissue samples with overall methodological assay  
37 variability from 8.6% to 16%. The assay readily detected reduced RNase H2 activity in  
38 lymphocytes of a patient with systemic sclerosis carrying a *RNASEH2C* variant.  
39 Implementation of larger control groups will help to assess the diagnostic and prognostic  
40 value of clinical screening for RNase H2 activity in the future.

41 **Introduction**

42 An increasing number of inflammatory and degenerative diseases are found to be associated  
43 with compromised genome integrity. In some of these, genome damage is assumed to be a  
44 central pathogenic event, while in others DNA damage may represent an epiphenomenon <sup>1-</sup>  
45 <sup>5</sup>. Resolution of RNA/DNA hybrids is central to various DNA transactions and maintenance of  
46 genome integrity. Mammals express RNases H1 and H2 which both cleave RNA/DNA  
47 hybrids by catalysing phosphodiester bond hydrolysis <sup>6</sup>. The enzymes play a role in  
48 resolution of R-loops, maturation of Okazaki fragments, repression of endogenous  
49 retroelements and degradation of RNA/DNA hybrids during cell death <sup>7-9</sup>. While RNase H1  
50 requires hybrids with at least 2 consecutive ribonucleotides, RNase H2 also cleaves single  
51 ribonucleotides embedded in the DNA double helix <sup>10</sup>. Ribonucleotides are incorporated into  
52 genomic DNA in very high numbers during replication due to the limited capacity of the  
53 replicative polymerases to discriminate them from desoxyribonucleotides (Lujan et al., 2013;  
54 Sassa et al., 2019). To prevent destabilization of DNA, ribonucleotides are rapidly removed  
55 post-replication by the ribonucleotide excision repair (RER) pathway initiated by RNase H2-  
56 mediated nicking 5' of the ribonucleotide. RER is the only error-free pathway capable of  
57 removing single ribonucleotides from DNA <sup>7-9</sup>. Failure to repair these lesions leads to DNA  
58 damage <sup>8,11-16</sup>. In mammals, complete loss of RNase H2 activity leads to embryonic lethality  
59 <sup>12,14</sup>. Partial loss of function, however, caused by hypomorphic *RNASEH2* alleles can lead to  
60 autoinflammation and autoimmunity, as for example in Aicardi-Goutières syndrome (AGS), a  
61 monogenic 'type I interferonopathy' <sup>17-19</sup>. Hypomorphic *RNASEH2* alleles also contribute to  
62 the polygenic predisposition for systemic lupus erythematosus (SLE) <sup>20-22</sup>. Investigation of  
63 RNase H2-deficient human cells and mice recently led to elucidation of an important link  
64 between genome damage and chronic inflammation <sup>12</sup>. DNA lesions ensuing from unrepaired  
65 ribonucleotides result in chromosomal aberrations, problems of mitotic segregation of  
66 defective chromosomes and formation of micronuclei. Upon collapse of the unstable  
67 micronuclear envelope, micronuclear chromatin is sensed by the intracellular DNA sensor  
68 cGAS, in turn resulting in activation of the sensor STING and activation of type I IFN and

69 proinflammatory cytokine responses<sup>23–25</sup>. Chronic activation of cGAS/STING signalling leads  
70 to autoinflammation, loss of T cell and B cell tolerance and autoimmune pathology<sup>18</sup>. RNase  
71 H2 deficiency also predisposes to cancer in mice<sup>26,27</sup> and RNase H2 loss-of-function  
72 mutations occur in large fractions of human chronic lymphocytic leukaemia and prostate  
73 cancer<sup>28</sup>. Reduced expression of RNase H2 is associated with reduced survival in colonic  
74 cancer<sup>27</sup>. Conversely, upregulation of RNase H2 subunits was found to be a malignancy  
75 factor in numerous carcinomas and sarcomas<sup>29–31</sup>. Moreover, double-strand breaks as  
76 resulting from compromised RNase H2 function were reported to contribute to  
77 neurodegeneration and aging<sup>32–34</sup>. Collectively, RNase H2 is a relevant diagnostic and  
78 prognostic factor in diverse human disease settings, warranting clinical testing for RNase H2  
79 activity in human cells or tissues.

80 Human RNase H2, unlike its monomeric prokaryotic isoenzyme RNase H1, is a  
81 heterotrimeric complex consisting of three proteins, the catalytic subunit RNase H2A and two  
82 auxiliary subunits, RNase H2B and RNase H2C<sup>35–37</sup>. About 50 disease-causing *RNASEH2*  
83 variants have been identified to date<sup>21,22,24,38</sup>, most of which are located in subunit B. While  
84 many variants exhibit reduced RNase H2 substrate binding and hydrolysis, other mutant  
85 proteins did not show impaired activity in cell free assays using recombinant enzyme<sup>39</sup>. The  
86 latter might feature compromised complex stability or interaction with additional proteins *in*  
87 *vivo*.

88 Although measurement of RNase H activity in mammalian cell samples has been performed  
89 since its discovery in 1969<sup>40</sup>, a standardized and validated method available for clinical use  
90 has been lacking. RNase H activity can be quantified by several different approaches relying  
91 on acid-insoluble precipitation, gel electrophoresis or HPLC. Two groups developed a  
92 fluorescence assay suitable for high-throughput studies and superior to earlier approaches  
93 with respect to precision, speed, labour and cost. RNase H2-mediated cleavage of a double-  
94 stranded DNA substrate containing a single ribonucleotide results in release of a fluorescein-  
95 labelled fragment from a quencher<sup>41,42</sup>. Herein, we adapt this assay into a standardized and

Clinical screening for RNase H2 activity

5

96 validated procedure relying on whole cell lysates for clinical screening of effective  
97 intracellular RNase H2 activity.

98

99 ***Materials and Methods:***

100 **Ethics approval and control group selection**

101 Ethics approval was granted by the ethics committee of the Medical Faculty Carl Gustav  
102 Carus, TU Dresden (EK 31022012). Volunteers older than 18 years of age without overt  
103 disease for the past two weeks were included after informed consent. Pregnancy or  
104 medication, abuse of alcohol or drugs were exclusion criteria. Volunteers did not receive  
105 financial or other compensation.

106 **Cell culture**

107 HeLa cells and murine embryonic fibroblasts (MEFs) were cultured in Gibco® DMEM –  
108 Dulbecco's Modified Eagle Medium (Fisher Scientific GmbH, Schwerte, Germany) at 37 °C  
109 and 5% CO<sub>2</sub>. For harvesting, medium was aspirated, adherent cells were washed twice with  
110 1x PBS followed by incubation with 1x trypsin (0.25%, Life Technologies Germany,  
111 Darmstadt, Germany) at 37°C for 2 minutes. Digest was stopped by addition of FCS-  
112 containing medium, cells were detached by pipetting, transferred into a 15-ml conical tube  
113 and pelleted at 330 x g for 5 min. Cells were resuspended, washed twice in 5 ml of chilled  
114 PBS for freezing, or in 1x FACS buffer for FACS sorting. For freezing, supernatant was  
115 discarded, pellets were shock-frozen in liquid nitrogen and then stored at -80°C for a  
116 maximum of 4 weeks.

117 **Isolation of Primary cells from human blood and mice**

118 For isolation of human PBMC, peripheral blood was collected in 10 ml heparinized tubes,  
119 stored at 4°C and analysed within 4 hours. Blood was diluted in an equal volume of PBS  
120 (calcium- and magnesium-free, equilibrated to room temperature (RT)). PBMC were isolated  
121 by standard Ficoll®-Paque density gradient centrifugation, and washed 3 times with chilled  
122 PBS. Murine keratinocytes, peritoneal cells, splenocytes and embryonic fibroblasts were  
123 isolated by standard procedures<sup>43–46</sup>

124 **Flow cytometric cell sorting**

125 PBMC from human donors were stained with anti-human CD3 (UCHT1) PE and anti-human  
126 CD19 (SJ25-C1) APC-H7, murine spleen cells with anti-CD19 (eBio1D3) PE, anti-CD4 (RM4-  
127 5) APC, anti-CD11b (M1/70) eF450 and anti-CD11c (N418) PE/Cy7, murine peritoneal  
128 lavage cells with anti-CD11b (M1/70) eF450 and anti-F4/80 (BM8) PE, and murine epidermal  
129 cells with anti-CD49f (eBioGoH3 rat) PE antibodies at 4°C for 30 minutes. Antibodies were  
130 purchased from Thermo Fisher Scientific Germany (Frankfurt a. M., Germany). Stained  
131 cells, or harvested cell culture cells, respectively, were washed with FACS buffer three times  
132 and resuspended in FACS buffer. Shortly before analysis, DAPI was added to a final  
133 concentration of 3 µM. Cells were sorted on a BD FACSAria™ III (Beckton Dickinson  
134 Germany, Heidelberg, Germany) excluding doublets and dead cells. Data was analyzed  
135 using FlowJo Single Cell Analysis Software (FLOWJO, LLC Data analysis software).

136 **Cell lysis and protein quantification**

137 Washed cell pellets were dissolved in a suitable amount of lysis buffer 1 and incubated on  
138 ice for 10 min. After addition of the same amount of lysis buffer 2 and another incubation on  
139 ice for 10 minutes, cell debris was spun down at 20 000 x g for 10 min at 4°C. Supernatant  
140 containing total cellular protein was harvested, and replicates were stored at -80°C. Protein  
141 concentration was determined using the Qubit™ Protein Assay Kit (ThermoFisher scientific)  
142 following recommendations of the vendor.

143 **RNase H2 activity assay and standard conditions**

144 RNase H2 activity was measured using a fluorometric assay approach adapted from Crow et  
145 al. (Crow et al., 2006). The type 2 RNase H-specific substrate consisted of an 18 bp DNA  
146 strand containing a single ribonucleotide 4 bp 5' of a covalently attached 3' fluorescein  
147 residue (oligonucleotide B) which was annealed to a 18 bp anti-sense DNA strand with a  
148 quenching 5' dabcyf residue (oligonucleotide D). Type 2 RNase H hydrolyses the  
149 phosphodiester bond 5' of the single ribonucleotide leading to dissociation of the fluorescein-  
150 carrying fragment from the quencher allowing photometric quantification (Figure 1A). As

151 positive controls, unquenched single-stranded substrate (B), unquenched double-stranded  
152 substrate lacking the dabcy1 residue at the anti-sense strand (BK), and plateau-fluorescence  
153 of the fluorescence progress curve (BD plateau), were implemented. BD plateau-  
154 fluorescence was determined by measuring fluorescence in wells containing 100 eqU HeLa  
155 RNase H2 and different amounts of substrate BD for 270 min until there was no further  
156 fluorescence increase. The mean of the last three measurement value triplicates was defined  
157 as BD plateau-fluorescence. As negative controls, quenched type 2 RNase H-specific  
158 substrate without addition of RNase HII (BD), quenched type 2 RNase H-specific substrate  
159 with addition of *heat-inactivated* cell lysate (BD + *h.i. lysate*), quenched double-stranded 2-  
160 O'-methylated RNA / DNA (type 2 RNase H-resistant) substrate (AD) with addition of active  
161 RNase HII, and blanks, were used. Desalted oligonucleotides were purchased from  
162 Eurogentec (Seraing, Belgium), dissolved in TE buffer to a final concentration of 100  $\mu$ M and  
163 annealed by heating to 90 °C for 2 minutes and then gradually cooling down by 1 °C per  
164 minute. Then, substrates were aliquoted and stored at -20 °C at a concentration of 10 pmol /  
165  $\mu$ l.

166 After cell isolation, cell number or protein content was quantified and cell pellets were lysed  
167 as described above. Cell lysates were premixed on ice with an 1 : 1 mixture of lysis buffer 1  
168 and 2 in a 96-well flat-bottomed plate. Then, equal amounts of cell lysate premixes were  
169 pipetted to another flat-bottomed 96-well reaction plate containing 100  $\mu$ l reaction buffer with  
170 270 nM type 2 RNase H-specific substrate (BD) using a multi-channel pipette. The reaction  
171 was monitored in a FLUOstar® Omega photometer at 37 °C for at least 120 min,  
172 fluorescence was measured at 3 minute intervals. Before measurement, the photometer was  
173 calibrated, setting the 30 nM unquenched single-stranded substrate B positive control  
174 fluorescence to 33333 FU. Photometer measurement range was set to 100 %. A 485 nm  
175 excitation filter and a 520 nm emission filter were used. Before each measurement, wells  
176 were mixed by orbital shaking (3 mm diameter, 5 s). Fluorescence was induced by 10  
177 flashes per well and cycle, and measurement was performed by orbital scanning by a  
178 vertically adjusted sensor. Fluorescence was measured using a time-resolved approach with



179 an integration delay of 47  $\mu$ s and an integration time of 1510  $\mu$ s. Positioning delay was set to  
180 0.2 s, measurement start time to 0.5 s. All assay steps except from photometric  
181 measurement were carried out on ice.

182 Fluorescence data was converted into the equivalent amount of cleaved substrate BD using  
183 the BD plateau fluorescence standard curve to acquire substrate cleavage progress curves.  
184 The cleavage rate was obtained by linear regression of the curves between minute 3 and 24  
185 (at least 5 data points). Using six quality controls with known activity and the substrate  
186 conversion standard curve (Figure 2D), cleavage rates were transformed into standardized  
187 catalytic activities (1 “eqU” = equivalent to the catalytic activity of 1 U RNase HII (NEB ®)  
188 under standard conditions). To correct for systematic error between different RNase H2  
189 assays, six internal standards (cell lysate aliquots with known RNase H2 activity) were  
190 measured in each experiment. For oligonucleotide sequences and buffer reagents, see Table  
191 1 and Table 2.

## 192 **Statistics**

193 Statistical tests were performed using GraphPad Prism™ 5.04 (GraphPad Software Inc., San  
194 Diego, California, USA). Sample size calculations (two-sample t-test) were conducted as  
195 proposed by Hulley et al.<sup>47</sup> using G\*Power Version 3.1.9.4 © (Franz Faul, Kiel, Germany).

196

197 **Results**

198 **Validation and benchmarks of the RNase H2 activity assay**

199 The assay principle was adapted from Crow et al.<sup>42</sup> as illustrated in Figure 1A. A double-  
200 stranded DNA oligonucleotide containing a single ribonucleotide and a fluorescent label  
201 (fluorescein) at the 3' end of the same strand were used as a type 2 RNase H-specific  
202 substrate. This substrate is cleaved by mammalian RNase H2, but also by bacterial RNase  
203 HII. Fluorescence was quenched by a dabcyI-group coupled to the 5' end of the  
204 complementary strand. Upon RNase H2-mediated cleavage at the position of the  
205 ribonucleotide, a short oligonucleotide carrying the fluorescein label is released from the  
206 quencher and fluorescence is quantified by photometry.

207 **Implementation of controls and standard curves**

208 Figure 1B shows fluorescence progress curves for type 2 RNase H-specific (BD) and control  
209 substrates (B, BK, AD, see Figure 1A). Bacterial RNase HII cleaved substrate BD with  
210 fluorescence reaching a plateau (Figure 1B), while this substrate showed only weak  
211 spontaneous background fluorescence (6.06% of plateau level). Spontaneous dequenching  
212 by degradation of quenched substrate BD was insignificant (Figure 1B). Addition of heat-  
213 inactivated cell lysate had no effect on fluorescence, indicating absence of unspecific (heat-  
214 sensitive) quenchers. Likewise, there was no unspecific substrate degradation detectable  
215 upon addition of active cell lysate to type 2 RNase H-resistant substrate AD (Figure 1B).  
216 Maximum fluorescence of fully cleaved substrate BD (BD plateau fluorescence) was defined  
217 as high control for substrate conversion.

218 To allow inter-laboratory reproducibility, the assay was validated using *E. coli* RNase HII with  
219 standardized activity. Different amounts of RNase HII were added to samples containing  
220 substrate BD and fluorescence progress curves (results for 55 U and 100 U RNase HII  
221 shown in Fig. 1B) were determined in pipetting triplicates under standard assay conditions.  
222 Fluorescence progress curves were double-curved exhibiting a significant lag phase. This  
223 was unexpected for a pseudo-first order irreversible reaction with a single substrate and

224 without any known inhibitors or any described conformational changes of the enzyme during  
225 the reaction<sup>48,49</sup>. Therefore, it was hypothesized, that this lag phase was due to non-linear,  
226 concentration-dependent fluorescence behaviour of the fluorophore. Indeed, implementation  
227 of a positive control fluorescence standard curve by enzymatic dequenching of substrates  
228 BD and B demonstrated fluorescence non-linearity of the fluorophore (Figure 1C). We  
229 therefore converted fluorescence data into amount of cleaved substrate based on the  
230 fluorescence standard curve (Figure 1C). Increase of amount of cleaved substrate over time  
231 showed perfectly linear behaviour without a significant lag phase (Figure 1D) allowing for  
232 definition of the steady-state phase, in which linear regression was performed to calculate  
233 RNase H2 activity. Linearity was highly significant with an r square value of >0.99 for all  
234 curves corresponding to RNase HII activity above 8.09 U (limit of quantification (LOQ), see  
235 below). Hence, steady state conditions could be assumed for enzyme activities between 8.09  
236 and 200 U of *E. coli* RNase HII under standard conditions.

237 Substrate B positive control fluorescence was used for photometer calibration to ensure  
238 reproducibility of experimental data. Plotting catalytic activities of standardized amounts of  
239 RNase HII yielded a substrate conversion standard curve (Figure 1E). Using this standard  
240 curve, measured catalytic activity was converted into the equivalent activity (“eqU”) of a  
241 defined amount of externally validated reference-RNase HII. Substrate conversion rates  
242 showed no significant deviation from linearity in the validated working range indicating small  
243 systematic error as well as absence of activators or inhibitors in the reaction mix.

244 For comparison and combination of data from different RNase H2 assays, internal standards  
245 (see Materials and Methods) were used. *Inter*-assay systematic error was assessed between  
246 three individual RNase H2 activity assays using aliquots of the same mouse embryonic  
247 fibroblast lysate. Means differed by 3.65% (SD=1.78; n=3). However, the precision by which  
248 this systematic error was calculated was strongly dependent on the number of matched  
249 quality controls established between the individual assays (Figure 1F). Use of six matched  
250 quality controls reduced variability of the calculation of systematic error to less than 3%.

251 **Sensitivity and ruggedness**

252 The average curve slope of substrate BD without addition of enzyme was 7.8 fluorescence  
253 units (FU) per minute (0.026 % of positive control fluorescence, calculated from data shown  
254 in Figure 1B). This was equivalent to a substrate cleavage rate of 5.4 fmol/min resulting in a  
255 limit of detection (LOD) of 9.7 fmol/min (2.09 eqU) and an LOQ of 32.3 fmol/min (8.09 eqU)  
256 <sup>50</sup>.

257 Designing the RNase H2 assay for high-throughput analysis required prolonged sample  
258 handling and sample storage. Systematic sample handling error was assessed by subjecting  
259 HeLa whole cell lysate to repeated freezing and thawing (Figure 2A) or by incubation at RT  
260 for defined time (Figure 2B). Each freeze-thaw cycle reduced RNase H2 activity by 0.37eqU  
261 (4.5% of LOQ). Likewise, incubation at RT reduced enzyme activity at a rate of 0.53 eqU per  
262 hour (6.6% of LOQ).

263 Standard sample handling involved one freeze-thaw cycle and incubation times between 30  
264 minutes and 2 hours, which were, however, performed on ice rather than RT, suggesting  
265 maximal loss of RNaseH2 activity of 1.43 eqU (17.7 % of LOQ) due to the processing.

266 **Steady-state kinetics and assay endpoints**

267 In search for the most-suited parameter to be determined (assay endpoint) for purposes of  
268 clinical screening, RNase H2 steady-state kinetics was studied. For this, 2.5 µg of HeLa  
269 protein (30 eqU) were added to wells containing eight different substrate concentrations  
270 spread around the expected  $K_M$ -value <sup>6,51</sup>. This was performed with HeLa protein from six  
271 individual HeLa cell cultures. Michaelis-Menten curves were determined using the initial-rates  
272 method and Michaelis-Menten non-linear regression (Figure 3). RNase H2 activity followed  
273 Michaelis-Menten kinetics with a mean  $K_M$  of 141.7 nM and a high mean  $C_V$  of 65.72 %.  
274 Calculation of  $V_{MAX}$  was less variable with a mean  $C_V$  of 24.45%. Still, highest precision was  
275 obtained by measuring RNase H2 activity at a single substrate concentration (provided a  
276 substrate concentration >2SD above  $K_M$  was used). At a substrate concentration of 270 nM,  
277 RNase H2 activity reached approximately 60% of  $V_{MAX}$  and measurement variability was

278 below 10%. Higher substrate concentrations lead to a systematic distortion of RNase H2  
279 activity due to non-linear fluorescence behaviour of the fluorophores (Figure 1C). Therefore,  
280 it was concluded, that RNase H2 activity at a substrate concentration of 270 nM was best-  
281 suited as assay endpoint for purposes of clinical screening.

## 282 **Precision**

283 Overall precision was determined for the assay based on primary or cultured cells. Hereby,  
284 the influence of different assay steps (cell isolation and preparation, pipetting, photometric  
285 measurement and linear regression) and normalization methods (normalization to cell  
286 number or total protein) on overall variability was assessed. Total assay variability including  
287 all biological and methodological error sources ranged from 8.6% to 16% ( $C_V$ ).

288 Variability due to linear regression, photometer imprecision or pipetting was assessed in an  
289 experiment with 105 pipetting replicates and averaged at 7.73 %. This accounted for more  
290 than half of total assay variability (56.2 %; 95 % CI = 14.7 % - 97.8 %,  $n = 4$ ), depending on  
291 the experimental approach and normalization method (contribution of single error sources on  
292 the total coefficient of variation was calculated using addition of variances). Under standard  
293 conditions, the largest part of this methodological error was attributed to pipetting error, while  
294 linear regression and photometer imprecision constituted minor error sources (not shown).  
295 Assay precision was strongly dependent on the normalization method used. Experiments  
296 relying on normalization to total protein averaged a total assay variability of 9.6 %, unaffected  
297 by the cell isolation method (FACS-sorting or direct lysis of cultured cells), while  
298 normalization to cell number resulted in a much larger total assay variability of 16 % (Figure  
299 4). We attributed this primarily to loss of cells during washing steps and, less predominantly,  
300 imprecisions of FACS cell counting. Isolation of primary cells from peripheral blood by Ficoll  
301 gradient centrifugation is known to yield PBMCs of variable cell type composition and viability  
302 <sup>52,53</sup>. Thus, isolation of primary blood cells resulted in higher overall variability (11.17 %) than  
303 direct lysis of cultured cells.

304 **Screening RNase H2 activity in human lymphocytes**

305 RNase H2 activity differed significantly between cell types (Figure 5). In mouse cells, RNase  
306 H2 activity changed with cell cycle phase (Supplemental Figure S2). To reduce variability, we  
307 aimed to assay for enzyme activity in one particular cell type rather than in samples  
308 containing undefined mixtures of different cells. We chose to base the assay on  
309 lymphocytes as they are easily obtained in large numbers from blood and feature high  
310 RNase H2 activity (Figure 5 and Supplemental Table S1). PBMCs were obtained from blood  
311 samples of 24 healthy donors (Supplemental Figure S1) with unknown *RNASEH2* genotypes  
312 by FICOLL® gradient centrifugation. CD19<sup>+</sup> B cells and CD3<sup>+</sup> T cells were isolated by flow  
313 cytometric sorting. From a 10 ml blood sample,  $4.0 \times 10^5$  B cells and  $3.0 \times 10^6$  T cells were  
314 obtained, sufficient for multiple replicate measurements (Supplemental Table S1). Control  
315 group size was designed to allow detection of a reduction of RNase H2 activity by 30 % with  
316 a statistical power of 90 % and  $\alpha$  of 0.10.

317 In T cells, RNase H2 activity per  $\mu\text{g}$  of cellular protein was about 3-fold higher than in B cells  
318 (Figure 6B), while RNase H2 activity per cell did not differ significantly between B and T cells  
319 (Figure 6C), reflecting higher total protein content of B cells compared to T cells. *Inter-*  
320 individual assay variability in T cells was approximately four-fold lower as in B cells,  
321 irrespective of the normalization method (Fig. 6D).

322 In T cells, *inter-* and *intra-*individual variability did not differ significantly. When activity was  
323 measured in T cells with normalization to cell numbers, the highest error source was  
324 methodological variability. In B cells, however, *inter-*individual variability clearly exceeded  
325 *intra-*individual and methodological variability. Gender and age did not contribute to *inter-*  
326 individual variability (not shown).

327 Collectively, we show that quantification of RNase H2 activity in T cells requires small  
328 amounts of venous blood and shows little *inter-*individual and *intra-*individual variation  
329 making it a suitable method for clinical use.

330 ***RNASEH2C c.468G>T* reduces RNase H2 activity in T cells**

331 A pilot experiment was performed on a systemic sclerosis patient carrying an *RNASEH2C*  
332 variant with so far unknown effects on RNase H2 activity (c.468G>T, rs61736590). The  
333 condition of this 60-year old female was classified as 'limited disease' (onset with 33 years)  
334 with antinuclear antibodies (titre 1:2560, Scl 70), Raynaud's syndrome, mutilation of finger  
335 tips by digital ulcers at onset of the disease, lung fibrosis and oesophageal involvement. She  
336 received no immunomodulatory or immunosuppressive therapy. The heterozygous mutation  
337 in *RNASEH2C* was identified by whole exome sequencing and verified by Sanger  
338 sequencing of DNA from PBMCs (Figure 7A). RNase H2 activity measured in triplicate  
339 samples was compared to the group of healthy controls (n = 24, Supplemental Figure S1)  
340 using unpaired two-tailed t-tests with Welch's correction. RNase H2 activity per cell was  
341 significantly reduced in the patient's T cells compared to the control group. Residual activity  
342 per cell and per µg of cellular protein in T cells was 80 % and 63.5 % of control activity,  
343 respectively (Figure 7B-D). Collectively, our data show that the assay readily detected the  
344 reduction of RNase H2 activity caused by the heterozygous *RNASEH2 c.468G>T* variant.

345

346 **Discussion:**

347 We present standardization and validation of an assay allowing for quantification of RNase  
348 H2 activity in cell lysates. The assay is based on the experimental procedure published by  
349 Crow et al <sup>42</sup>, and is suitable for screening of clinical samples. Measurement of RNase H2  
350 activity has primarily been performed on recombinant wild type or mutant RNase H2  
351 <sup>6,12,35,36,54</sup>. Assays based on recombinant protein have important limitations as effects of e.g.  
352 protein stability or protein-protein interaction are not captured. Recombinant protein  
353 expression requires sequencing and cloning of gene variants, precluding adaptation to  
354 settings of clinical screening. Assays involving overexpression of recombinant proteins also  
355 do not address effects of intracellular expression levels of functional enzyme. We directly  
356 measure RNase H2 activity of cell lysates, enabling determination of enzyme activity per cell  
357 or per amount of cellular protein, capturing any effect on levels of functional enzyme in the  
358 cell, including alteration of transcription, posttranscriptional regulation, posttranslational  
359 modifications and protein stability.

360 While the assay is based on lymphocytes sorted by FACS in the present study, less  
361 sophisticated methods of cell separation are clearly sufficient. In contrast to flow cytometric  
362 sorting, immunomagnetic cell separation <sup>55</sup>, is cost- and labor-efficient, requires only simple  
363 equipment, and allows fast enrichment of B or T cells from peripheral blood samples to high  
364 purity. Future establishment of a larger and more heterogeneous control cohort evenly  
365 distributed between all age groups and gender is necessary to identify potential confounders  
366 (e.g. ethnicity, hormonal changes, medication, stress, circadian rhythm, CD4+/CD8+ ratio,  
367 etc.) contributing to *inter*- and *intra*-individual variability. While the assay enables reliable  
368 detection of activity reduction by 30% comparing triplicate measurements of a single sample  
369 to the control group mean (24 individuals), increasing replicate measurements of patient  
370 samples to 5 and control cohort size to 100 would improve the minimal detectable activity  
371 reduction to 20%, which is in the range of inter-individual variability. Therefore, an activity  
372 reduction of less than 20% is unlikely to be clinically relevant. Measurement of RNase H2  
373 activity in triplicate T cell samples from a patient suffering from systemic sclerosis revealed



374 significantly reduced activity by normalization to cell number or to amount of total cellular  
375 protein. Since RNase H2 is a nuclear protein and genomic DNA is its substrate, and cell  
376 volume the activity per genome, i.e. per cell, seems to be the most important parameter,  
377 while cellular volume and protein content are subject to fluctuations, e.g. depending on the  
378 cell cycle (Supplemental Figure S2). The assay is fully standardized and externally validated  
379 quality controls meeting all requirements for certified reference materials were implemented  
380 ensuring inter-laboratory reproducibility. High sensitivity, robustness against impact of  
381 sample storage or freezing and a broad working range enable versatile applications.  
382 Collectively, we provide a fully standardized, validated and benchmarked assay suitable for  
383 quantification of RNase H2 enzyme activity in clinical cell samples. The assay is sensitive  
384 and precise. It revealed differences in RNase H2 activity dependent on cell type and cell  
385 cycle phase as well as the reduction of enzyme activity caused by a heterozygous  
386 RNASEH2C partial loss-of-function mutation. The assay will be valuable for screening clinical  
387 entities for alterations of RNase H2 function in autoimmunity and cancer.  
388

389 ***Acknowledgements***

390 We thank Barbara Utess, Livia Schulze, Christina Hiller and Christa Haase for excellent  
391 technical support, Björn Hiller for help with the isolation of primary cells. iPS cells were kindly  
392 provided by Michael Haase, Department of Pediatric Surgery, Medical Faculty, TU Dresden.  
393 This work was funded by the Deutsche Forschungsgemeinschaft (DFG, German Research  
394 Foundation) – Project-ID 369799452 – TRR237 Nucleic Acid Immunity, project B17 to A.R.,  
395 project B19 to R.B. and project B20 to C.G., as well as by Else Kröner-Fresenius-Foundation  
396 grant 060\_380627 to M.S.

397

398 **References**

- 399 1. Gustafson MA, Sullivan ED, Copeland WC. Consequences of compromised  
400 mitochondrial genome integrity. *DNA Repair (Amst)*, 2020, 93:102916
- 401 2. McKinnon PJ. Genome integrity and disease prevention in the nervous system. *Genes*  
402 *Dev*, 2017, 31:1180–94
- 403 3. Jackson SP, Bartek J. The DNA-damage response in human biology and disease.  
404 *Nature*, 2009, 461:1071–8
- 405 4. Chow HM, Herrup K. Genomic integrity and the ageing brain. *Nat Rev Neurosci*, 2015,  
406 16:672–84
- 407 5. Madabhushi R, Pan L, Tsai LH. DNA damage and its links to neurodegeneration.  
408 *Neuron*, 2014, 83:266–82
- 409 6. Rohman MS, Koga Y, Takano K, Chon H, Crouch RJ, Kanaya S. Effect of the disease-  
410 causing mutations identified in human ribonuclease (RNase) H2 on the activities and  
411 stabilities of yeast RNase H2 and archaeal RNase HII. *FEBS J*, 2008, 275:4836–49
- 412 7. Heider MR, Burkhart BW, Santangelo TJ, Gardner AF. Defining the RNaseH2  
413 enzyme-initiated ribonucleotide excision repair pathway in Archaea. *J Biol Chem*,  
414 2017, 292:8835–45
- 415 8. Kellner V, Luke B. Molecular and physiological consequences of faulty eukaryotic  
416 ribonucleotide excision repair. *EMBO J*, 2020, 39:e102309
- 417 9. Feng S, Cao Z. Is the role of human RNase H2 restricted to its enzyme activity? *Prog*  
418 *Biophys Mol Biol*, 2016, 121:66–73
- 419 10. Tannous E, Kanaya E, Kanaya S. Role of RNase H1 in DNA repair: removal of single  
420 ribonucleotide misincorporated into DNA in collaboration with RNase H2. *Sci Rep*,  
421 2015, 5:9969
- 422 11. Noy A, Pérez A, Lankas F, Javier Luque F, Orozco M. Relative flexibility of DNA and  
423 RNA: A molecular dynamics study. *J Mol Biol*, 2004, 343:627–38
- 424 12. Reijns MAM, Rabe B, Rigby RE, Mill P, Astell KR, Lettice LA, Boyle S, Leitch A,  
425 Keighren M, Kilanowski F, Devenney PS, Sexton D, Grimes G, Holt IJ, Hill RE, Taylor

- 426 MS, Lawson KA, Dorin JR, Jackson AP. Enzymatic removal of ribonucleotides from  
427 DNA is essential for mammalian genome integrity and development. *Cell*, 2012,  
428 149:1008–22
- 429 13. Williams JS, Lujan SA, Kunkel TA. Processing ribonucleotides incorporated during  
430 eukaryotic DNA replication. *Nat Rev Mol Cell Biol*, 2016, 17:350–63
- 431 14. Hiller B, Achleitner M, Glage S, Naumann R, Behrendt R, Roers A. Mammalian RNase  
432 H2 removes ribonucleotides from DNA to maintain genome integrity. *J Exp Med*, 2012,  
433 209:1419–26
- 434 15. MacKenzie KJ, Carroll P, Martin CA, Murina O, Fluteau A, Simpson DJ, Olova N,  
435 Sutcliffe H, Rainer JK, Leitch A, Osborn RT, Wheeler AP, Nowotny M, Gilbert N,  
436 Chandra T, Reijns MAM, Jackson AP. CGAS surveillance of micronuclei links genome  
437 instability to innate immunity. *Nature*, 2017, 548:461–5
- 438 16. Sassa A, Yasui M, Honma M. Current perspectives on mechanisms of ribonucleotide  
439 incorporation and processing in mammalian DNA. *Genes Environ*, 2019, 41:3
- 440 17. Crow YJ, Manel N. Aicardi-Goutières syndrome and the type I interferonopathies. *Nat*  
441 *Rev Immunol*, 2015, 15:429–40
- 442 18. Lee-Kirsch MA, Wolf C, Kretschmer S, Roers A. Type I interferonopathies—an  
443 expanding disease spectrum of immunodysregulation. *Semin Immunopathol*, 2015,  
444 37:349–57
- 445 19. Volpi S, Picco P, Caorsi R, Candotti F, Gattorno M. Type I interferonopathies in  
446 pediatric rheumatology. *Pediatr Rheumatol*, 2016, 14:1–12
- 447 20. Crow YJ, Rehwinkel J. Aicardi-Goutières syndrome and related phenotypes: Linking  
448 nucleic acid metabolism with autoimmunity. *Hum Mol Genet*, 2009, 18:130–6
- 449 21. Lee-Kirsch MA, Wolf C, Günther C. Aicardi-Goutières syndrome: A model disease for  
450 systemic autoimmunity. *Clin Exp Immunol*, 2014, 175:17–24
- 451 22. Günther C, Kind B, Reijns MAM, Berndt N, Martinez-Bueno M, Wolf C, Tüngler V,  
452 Chara O, Lee YA, Hübner N, Bicknell L, Blum S, Krug C, Schmidt F, Kretschmer S,  
453 Koss S, Astell KR, Ramantani G, Bauerfeind A, Morris DL, Graham DSC, Bubeck D,

- 454 Leitch A, Ralston SH, Blackburn EA, Gahr M, Witte T, Vyse TJ, Melchers I, Mangold  
455 E, Nöthen MM, Aringer M, Kuhn A, Lüthke K, Unger L, et al. Defective removal of  
456 ribonucleotides from DNA promotes systemic autoimmunity. *J Clin Invest*, 2015,  
457 125:413–24
- 458 23. Mackenzie KJ, Carroll P, Lettice L, Tarnauskaitė Ž, Reddy K, Dix F, Revuelta A,  
459 Abbondati E, Rigby RE, Rabe B, Kilanowski F, Grimes G, Fluteau A, Devenney PS,  
460 Hill RE, Reijns MA, Jackson AP. Ribonuclease H2 mutations induce a cGAS / STING -  
461 dependent innate immune response. *EMBO J*, 2016, 35:831–44
- 462 24. Pokatayev V, Hasin N, Chon H, Cerritelli SM, Sakhuja K, Ward JM, Douglas Morris H,  
463 Yan N, Crouch RJ. RNase H2 catalytic core Aicardi-Goutières syndrome-Related  
464 mutant invokes cGAS-STING innate immunosensing pathway in mice. *J Exp Med*,  
465 2016, 213:329–36
- 466 25. Bartsch K, Knittler K, Borowski C, Rudnik S, Damme M, Aden K, Spehlmann ME, Frey  
467 N, Saftig P, Chalaris A, Rabe B. Absence of RNase H2 triggers generation of  
468 immunogenic micronuclei removed by autophagy. *Hum Mol Genet*, 2017, 26:3960–72
- 469 26. Hiller B, Hoppe A, Haase C, Hiller C, Schubert N, Müller W, Reijns MAM, Jackson AP,  
470 Kunkel TA, Wenzel J, Behrendt R, Roers A. Ribonucleotide excision repair is essential  
471 to prevent squamous cell carcinoma of the skin. *Cancer Res*, 2018, 78:5917–26
- 472 27. Aden K, Bartsch K, Dahl J, Reijns MAM, Esser D, Sheibani-Tezerji R, Sinha A,  
473 Wottawa F, Ito G, Mishra N, Knittler K, Burkholder A, Welz L, van Es J, Tran F,  
474 Lipinski S, Kakavand N, Boeger C, Lucius R, von Schoenfels W, Schafmayer C, Lenk  
475 L, Chalaris A, Clevers H, Röcken C, Kaleta C, Rose-John S, Schreiber S, Kunkel T,  
476 Rabe B, Rosenstiel P. Epithelial RNase H2 Maintains Genome Integrity and Prevents  
477 Intestinal Tumorigenesis in Mice. *Gastroenterology*, 2019, 156:145-159.e19
- 478 28. Zimmermann M, Murina O, Reijns MAM, Agathangelou A, Challis R, Tarnauskaite Ž,  
479 Muir M, Fluteau A, Aregger M, McEwan A, Yuan W, Clarke M, Lambros MB,  
480 Paneesha S, Moss P, Chandrashekar M, Angers S, Moffat J, Brunton VG, Hart T, De  
481 Bono J, Stankovic T, Jackson AP, Durocher D. CRISPR screens identify genomic

- 482 ribonucleotides as a source of PARP-trapping lesions. *Nature*, 2018, 559:285–9
- 483 29. Mottaghi-Dastjerdi N, Soltany-Rezaee-Rad M, Sepehrizadeh Z, Roshandel G,  
484 Ebrahimifard F, Setayesh N. Identification of novel genes involved in gastric  
485 carcinogenesis by suppression subtractive hybridization. *Hum Exp Toxicol*, 2015,  
486 34:3–11
- 487 30. Flanagan JM, Funes JM, Henderson S, Wild L, Carey N, Boshoff C. Genomics screen  
488 in transformed stem cells reveals RNASEH2A, PPAP2C, and ADARB1 as putative  
489 anticancer drug targets. *Mol Cancer Ther*, 2009, 8:249–60
- 490 31. Williams KA, Lee M, Hu Y, Andreas J, Patel SJ, Zhang S, Chines P, Elkahloun A,  
491 Chandrasekharappa S, Gutkind JS, Molinolo AA, Crawford NPS. A Systems Genetics  
492 Approach Identifies CXCL14, ITGAX, and LPCAT2 as Novel Aggressive Prostate  
493 Cancer Susceptibility Genes. *PLoS Genet*, 2014, 10:e1004809
- 494 32. White RR, Vijg J. Do DNA Double-Strand Breaks Drive Aging? *Mol Cell*, 2016,  
495 63:729–38
- 496 33. Zhu L-S, Wang D-Q, Cui K, Liu D, Zhu L-Q. Emerging Perspectives on DNA Double-  
497 strand Breaks in Neurodegenerative Diseases. *Curr Neuropharmacol*, 2019, 17:1146–  
498 57
- 499 34. Storci G, De Carolis S, Papi A, Bacalini MG, Gensous N, Marasco E, Tesei A, Fabbri  
500 F, Arienti C, Zanoni M, Sarnelli A, Santi S, Olivieri F, Mensà E, Latini S, Ferracin M,  
501 Salvioli S, Garagnani P, Franceschi C, Bonafè M. Genomic stability, anti-inflammatory  
502 phenotype, and up-regulation of the RNaseH2 in cells from centenarians. *Cell Death*  
503 *Differ*, 2019, 26:1845–58
- 504 35. Rychlik MP, Chon H, Cerritelli SM, Klimek P, Crouch RJ, Nowotny M. Crystal  
505 structures of rnas h2 in complex with nucleic acid reveal the mechanism of RNA-DNA  
506 junction recognition and cleavage. *Mol Cell*, 2010, 40:658–70
- 507 36. Shaban NM, Harvey S, Perrino FW, Hollis T. The structure of the mammalian RNase  
508 H2 complex provides insight into RNA-DNA hybrid processing to prevent immune  
509 dysfunction. *J Biol Chem*, 2010, 285:3617–24

- 510 37. Reijns MAM, Bubeck D, Gibson LCD, Graham SC, Baillie GS, Jones EY, Jackson AP.  
511 The structure of the human RNase H2 complex defines key interaction interfaces  
512 relevant to enzyme function and human disease. *J Biol Chem*, 2011, 286:10530–9
- 513 38. Lo MS. Monogenic Lupus. *Curr Rheumatol Rep*, 2016, 18:1–7
- 514 39. Figiel M, Chon H, Cerritelli SM, Cybulska M, Crouch RJ, Nowotny M. The structural  
515 and biochemical characterization of human RNase H2 complex reveals the molecular  
516 basis for substrate recognition and Aicardi-Goutières syndrome defects. *J Biol Chem*,  
517 2011, 286:10540–50
- 518 40. Stein H, Hausen P. Enzyme from calf thymus degrading the RNA moiety of DNA-RNA  
519 hybrids: Effect on DNA-dependent RNA polymerase. *Science (80- )*, 1969, 166:393–5
- 520 41. Eder PS, Walder RY, Walder JA. Substrate specificity of human RNase H1 and its role  
521 in excision repair of ribose residues misincorporated in DNA. *Biochimie*, 1993,  
522 75:123–6
- 523 42. Crow YJ, Leitch A, Hayward BE, Garner A, Parmar R, Griffith E, Ali M, Semple C,  
524 Aicardi J, Babul-Hirji R, Baumann C, Baxter P, Bertini E, Chandler KE, Chitayat D,  
525 Cau D, Déry C, Fazzi E, Goizet C, King MD, Klepper J, Lacombe D, Lanzi G, Lyall H,  
526 Martínez-Frías ML, Mathieu M, McKeown C, Monier A, Oade Y, Quarrell OW, Rittey  
527 CD, Rogers RC, Sanchis A, Stephenson JBP, Tacke U, et al. Mutations in genes  
528 encoding ribonuclease H2 subunits cause Aicardi-Goutières syndrome and mimic  
529 congenital viral brain infection. *Nat Genet*, 2006, 38:910–6
- 530 43. Jensen KB, Driskell RR, Watt FM. Assaying proliferation and differentiation capacity of  
531 stem cells using disaggregated adult mouse epidermis. *Nat Protoc*, 2010, 5:898–911
- 532 44. Ray A, Dittel BN. Isolation of mouse peritoneal cavity cells. *J Vis Exp*, 2010, 35:e1488
- 533 45. Lim JF, Berger H, Su IH. Isolation and activation of murine lymphocytes. *J Vis Exp*,  
534 2016:54596
- 535 46. Durkin M, Qian X, Popescu N, Lowy D. Isolation of Mouse Embryo Fibroblasts. *BIO-*  
536 *PROTOCOL*, 2013, 3
- 537 47. Hulley S, Cummings S, Browner W, Grady D, Newman T. Estimating Sample Size and

- 538 Power: Applications and Examples. Edited by Hulley S, Cummings S, Browner W,  
539 Grady D and Newman T. Des. Clin. Res. Fourth Edi, Philadelphia (PA), Lippincott  
540 Williams & Wilkins, 2013, pp. 55–83
- 541 48. Robinson PK. Enzymes: principles and biotechnological applications. Essays  
542 Biochem, 2015, 59:1–41
- 543 49. Copeland RA. Enzymes. A Practical Introduction to Structure, Mechanism and Data  
544 Analysis. 2nd ed. New York, Wiley-VCH, Inc., 2000.  
545 <https://doi.org/10.1002/ange.19971091638>
- 546 50. Magnusson B, Örnemark U. Eurachem Guide: The Fitness for Purpose of Analytical  
547 Methods – A Laboratory Guide to Method Validation and Related Topics. 2nd ed.  
548 Eurachem, 2014. <https://doi.org/978-91-87461-59-0>
- 549 51. Dowd JE, Riggs DS. A Comparison of Estimates of Michaelis-Menten Kinetic  
550 Constants From Various Linear Transformations. J Biol Chem, 1965, 240:863–9
- 551 52. Goods BA, Sansing L, Vahey JM, Christopher Love J, Steinschneider AF, Askenase  
552 MH. Correction to: blood handling and leukocyte isolation methods impact the global  
553 transcriptome of immune cells. BMC Immunol, 2018, 19:1–12
- 554 53. Grievink HW, Luisman T, Kluft C, Moerland M, Malone KE. Comparison of Three  
555 Isolation Techniques for Human Peripheral Blood Mononuclear Cells: Cell Recovery  
556 and Viability, Population Composition, and Cell Functionality. Biopreserv Biobank,  
557 2016, 14:410–5
- 558 54. Chon H, Vassilev A, Depamphilis ML, Zhao Y, Zhang J, Burgers PM, Crouch RJ,  
559 Cerritelli SM. Contributions of the two accessory subunits, RNASEH2B and  
560 RNASEH2C, to the activity and properties of the human RNase H2 complex. Nucleic  
561 Acids Res, 2009, 37:96–110
- 562 55. Grützkau A, Radbruch A. Small but mighty: How the MACS1-technology based on  
563 nanosized superparamagnetic particles has helped to analyze the immune system  
564 within the last 20 years. Cytom Part A, 2010, 77:643–7
- 565 56. Smit JH, Van Der Velde JHM, Huang J, Trauschke V, Henrikus SS, Chen S,



- 566 Eleftheriadis N, Warszawik EM, Herrmann A, Cordes T. On the impact of competing  
567 intra- and intermolecular triplet-state quenching on photobleaching and photoswitching  
568 kinetics of organic fluorophores. *Phys Chem Chem Phys*, 2019, 21:3721–33
- 569 57. Torimura M, Kurata S, Yamada K, Yokomaku T, Kamataga Y, Kanagawa T, Kurane R.  
570 Fluorescence-Quenching Phenomenon by Photoinduced Electron Transfer between a  
571 Fluorescent Dye and a Nucleotide Base. *Anal Sci*, 2001, 17:155–60
- 572 58. Sakaue-Sawano A, Kurokawa H, Morimura T, Hanyu A, Hama H, Osawa H,  
573 Kashiwagi S, Fukami K, Miyata T, Miyoshi H, Imamura T, Ogawa M, Masai H,  
574 Miyawaki A. Visualizing Spatiotemporal Dynamics of Multicellular Cell-Cycle  
575 Progression. *Cell*, 2008, 132:487–98
- 576
- 577

578 **Tables**

579 **Table 1**

| <b>buffer/ solution</b>             | <b>reagents</b>                                                                                                                                             |
|-------------------------------------|-------------------------------------------------------------------------------------------------------------------------------------------------------------|
| RNase H2 assay reaction buffer (1x) | 60 mM KCl, 50 mM Tris.HCl pH 8.0, 20 mM MgCl <sub>2</sub> , add fresh Triton X-100 and BSA to a final concentration of 0.01%                                |
| lysis buffer 1 (1x)                 | 50 mM TRIS.HCL pH 8.0, 280 mM NaCl, 0,5% v/v NP40, 0,2 mM EDTA, 0,2 mM EGTA, 10% v/v glycerol, 0.1 mM sodium orthovanadate, add fresh 1 mM DTT and 1mM PMSF |
| lysis buffer 2 (1x)                 | 20 mM HEPES, 10 mM KCl, 1 mM EDTA, 0.1 mM sodium orthovanadate, add fresh 1 mM DTT and 1mM PMSF                                                             |

580

581 **Table 2**

| <b>RNase H2 assay substrates</b>                    | <b>sequence</b>                         |
|-----------------------------------------------------|-----------------------------------------|
| oligonucleotide A: 2-O'-methylated RNA              | 5'-GAUCUGAGCCUGGGAGCU-fluorescein-3'    |
| oligonucleotide B: DNA with a single ribonucleotide | 5'-GATCTGAGCCTGGG[rA]GCT-fluorescein-3' |
| oligonucleotide D: DNA                              | 5'-Dabcyl-AGCTCCCAGGCTCAGATC-3'         |
| oligonucleotide K: DNA                              | 5'-AGCTCCCAGGCTCAGATC-3'                |

582

583 **Figure descriptions**

584 **Figure 1 Assay principle and implementation of controls.**

585 **A)** RNase H2 activity assay design (adapted from Crow et al. <sup>42</sup>). Substrate BD, specific for  
586 mammalian RNase H2 and bacterial RNase HII, is an 18 bp double-stranded DNA containing  
587 a single ribonucleotide and a fluorescent residue (fluorescein) as well as a quencher (dabcyl)  
588 on the complementary strand. RNase H2 cleavage at the position of the ribonucleotide  
589 releases fluorescein from the quencher. Positive control substrates BK and B are identical  
590 but lack the quencher or the complementary strand, respectively. RNase H2 does not cleave  
591 single-stranded substrates like substrate B. Negative control substrate AD contains  
592 methylated RNA resistant to RNase H2 and was used to control for substrate dequenching  
593 by spontaneous dissociation.

594 **B)** Addition of 100U RNase HII lead to cleavage of positive control BK as well as substrate  
595 BD with fluorescence reaching a plateau (BK plateau and BD plateau) above the  
596 fluorescence levels of positive controls B and BK. This aligns with a quenching effect of the  
597 complementary strand <sup>56</sup>. Positive control BK exceeded positive control B fluorescence when  
598 no enzyme was added. This is explained with decreased fluorophore stability of substrate B  
599 lacking the protective effect of the quenching complementary strand during storage <sup>57</sup>. Thus,  
600 BD plateau fluorescence is the only valid positive control for calculation of substrate  
601 cleavage. Fluorescence negative controls included quenched double-stranded substrate BD  
602 without addition of RNase HII (BD no enzyme) and with addition of *heat-inactivated* cell  
603 lysate (BD + *h.i.* lysate), quenched type 2 RNase H-resistant substrate (AD + RNase HII) and  
604 blanks. Negative control fluorescence reached a maximum of 6.06 % (95 % CI: 5.26 % - 6.86  
605 %) of BD plateau fluorescence. Unspecific substrate cleavage or degradation was  
606 insignificant with 0.09 % per minute (95 % CI: 0.03 % / min - 0.15 % / min). Fluorophores  
607 showed stable fluorescence with a fluorescence decrease of 1.68 % per hour (95%CI: 0.59  
608 % / h - 2.78 % / h). Addition of lower amounts of RNase HII (e.g. 55 U, other curves are not

609 shown) yielded an increase in fluorescence with unexpectedly long lag phase before a hardly  
610 definable steady state phase and a plateau phase.

611 **C)** Implementation of fluorescence standard curves revealed concentration-dependent  
612 fluorescence non-linearity of the fluorophores. B and BD plateau fluorescence were  
613 measured in triplicates at eight different substrate concentrations (20nM - 500nM) after  
614 addition of 100 U RNase HII.

615 **D)** With help of the BD plateau fluorescence standard curve, fluorescence progress curves  
616 were transformed into substrate cleavage progress curves now showing a perfectly linear  
617 segment indicating steady-state conditions of the pseudo-first order irreversible cleavage  
618 reaction.

619 **E)** A substrate conversion standard curve was implemented using different amounts of E.coli  
620 RNase HII. Using this curve and quality controls, measured catalytic activity can be assigned  
621 a standardized, externally validated unit ("eqU"). The curve showed no significant deviation  
622 from linearity in the implemented assay working range (8.09 U – 200 U) (linear regression r  
623 square = 0.99; Run's test: deviation from linearity not significant, P = 0.44).

624 **F)** Mean systematic error between separate RNase H2 assays performed under the same  
625 assay conditions was 3.65 % (SD = 1.78; n = 3). The precision by which this systematic error  
626 could be calculated was dependent on the number of quality controls used. Use of six  
627 matched quality controls reduced variability of the calculation of systematic error to less than  
628 3%.

629 Mean plus/ minus SD is shown.

## 630 **Figure 2 Ruggedness.**

631 **A)** Aliquots of the same sample were frozen at -20 °C and thawed up to 6 times. Each cycle  
632 of freezing and thawing resulted in a mean activity loss of -0.37 eqU (Pearson's r = -0.94).

633 **B)** Aliquots of the same sample were stored at 26°C for up to 4 hours and activities were  
634 compared with the RNase H2 assay. Mean loss of activity was -0.53 eqU/ hour (Pearson's r  
635 = -0.91).

636 **Figure 3 Steady-state kinetics.**

637 The mean  $K_M$  was 141.7 nM (SEM = 27.86 %; 95 % CI: 69.4 – 213.9 nM). Calculation of  $K_M$   
638 and  $V_{MAX}$  values showed high variability ( $C_V(K_M) = 65.72$  %;  $C_V(V_{MAX}) = 24.45$  %), while the  
639  $C_V$  of individual measurements was dependent on the substrate concentration. RNase H2  
640 activity at a substrate concentration of 270 nM (> 2 SD above  $K_M$ ) was associated with a  $C_V$   
641 below 10 % and implemented as assay end-point.

642 Mean  $\pm$  SD is shown.

643 **Figure 4 Assay precision.**

644 RNase H2 activity was determined in lysates of mouse embryonic fibroblasts (MEFs), lysates  
645 of PBMCs isolated from human blood by Ficoll-Paque gradient centrifugation, lysates of  
646 HeLa cells (sorted for living cells via FACS) with normalization to total protein or cell number  
647 as indicated. Total assay variability of the different approaches is shown above the bars.  
648 Stacked colours indicate contributions of different error sources (cell isolation and  
649 preparation; cell/protein quantification; pipetting and measurement imprecision determined in  
650 separate experiments (not shown).

651 **Figure 5 RNase H2 activity of different cell types.**

652 Human induced pluripotent stem (iPS) cells, human embryonic kidney 293 cells (HEK293T),  
653 HeLa cells, human fibroblasts from the BJ cell line, human peripheral blood T cells (CD3<sup>+</sup>)  
654 and B cells (CD19<sup>+</sup>), murine spleen T cells (CD4<sup>+</sup>), B cells (CD19<sup>+</sup>), dendritic cells  
655 (CD11b<sup>+</sup>/CD11c<sup>+</sup>) and macrophages (CD11b<sup>+</sup>), murine peritoneal macrophages (F4/80<sup>+</sup>),  
656 murine epidermal stem cells (CD49f<sup>+</sup>) and mouse embryonic fibroblasts (MEF) were purified  
657 and counted by flow cytometry. Cells were lysed, protein concentration was determined and  
658 RNase H2 activity was measured in biological triplicates under standard assay conditions.

659 **A)** RNase H2 activity normalized to cell number.

660 **B)** RNase H2 activity normalized to amount of total protein.

661 **C)** total cellular protein content of the cell types.

662 Mean  $\pm$  SD is shown, significance was tested with the unpaired two tailed t-test, \*\*\*\*  $p <$   
663 0.0001, \*\*\*  $p <$  0.001, \*\*  $p <$  0.01 \*  $p <$  0.5, n.s. not significant.

664 **Figure 6 Control group benchmarks.**

665 **A)** RNase H2 activity normalized to total protein in T cells was significantly higher than in B  
666 cells.

667 **B)** RNase H2 activity normalized to cell number did not differ significantly, but showed  
668 significantly smaller variability in T cells.

669 **C)** Strong *inter*-individual variability was observed in B cells, while inter- and intra-individual  
670 variability were approximately on the same level as methodological error in T cells.  
671 Methodological variability was determined in validation experiments.

672 Median is shown, boxes indicate 25<sup>th</sup> and 75<sup>th</sup> percentile, whiskers indicating 10<sup>th</sup> and 90<sup>th</sup>  
673 percentile. Extreme outliers (>95<sup>th</sup> percentile oder < 5<sup>th</sup> percentile) are shown in the diagram,  
674 but were excluded for statistical testing. Normality could be assumed for all groups (Shapiro-  
675 Wilk test). Significance was tested via unpaired two tailed t-test, \*\*\*\*  $p <$  0.0001, \*\*\*  $p <$   
676 0.001, \*\*  $p <$  0.01 \*  $p <$  0.5, n.s. not significant.

677 **Figure 7 RNase H2 activity in T cells from a patient carrying a heterozygous**  
678 ***RNASEH2C c.468G>T* variant.**

679 **A)** Verification of the mutation by Sanger sequencing of DNA from PBMCs. The mutation is  
680 silent but affects the last base of exon 3, which is part of the splice donor site. This leads to  
681 aberrant splicing of the *RNASEH2C* mRNA, resulting in a sterile transcript <sup>22</sup>.

682 **B – D)** RNase H2 activity normalized to cell number (B) or to total cellular protein (C) and  
683 total cellular protein content (D) of T cells heterozygous for the *RNASEH2C c.468G>T*  
684 variant compared to T cells from healthy controls (with unknown *RNASEH2* genotype, n=24).  
685 Median is shown, boxes indicate 25<sup>th</sup> and 75<sup>th</sup> percentile, whiskers indicate 10<sup>th</sup> and 90<sup>th</sup>  
686 percentile, extreme outliers (>95<sup>th</sup> percentile oder < 5<sup>th</sup> percentile) are shown in the diagram,  
687 but were excluded for significance testing via unpaired two tailed t-test with Welch's  
688 correction, \*\*\*\*  $p <$  0.0001, \*\*\*  $p <$  0.001, \*\*  $p <$  0.01 \*  $p <$  0.5, n.s. not significant.

689 **Supplemental tables**

|               | <b>cell type</b>                                              | <b>minimum amount of protein/well</b> | <b>maximum amount of protein/well</b> | <b>optimal amount of protein/well</b> | <b>number of cells yielding 1 µg total protein</b> |
|---------------|---------------------------------------------------------------|---------------------------------------|---------------------------------------|---------------------------------------|----------------------------------------------------|
| <b>murine</b> | CD4 <sup>+</sup> primary T cells                              | 1.1                                   | 26.2                                  | 2.7 – 13.3                            | 2.6E+04                                            |
|               | CD11b <sup>+</sup> spleen macrophages                         | 2.9                                   | 70.6                                  | 7.2 – 35.8                            | 8.2E+03                                            |
|               | CD11b <sup>+</sup> /CD11c <sup>+</sup> spleen dendritic cells | 2.8                                   | 67.2                                  | 6.8 – 34.1                            | 5.8E+03                                            |
|               | CD19 <sup>+</sup> primary B cells                             | 1.3                                   | 32.6                                  | 3.3 – 16.6                            | 9.7E+04                                            |
|               | F4/80 <sup>+</sup> peritoneal macrophages                     | 1.7                                   | 42.1                                  | 4.3 – 21.3                            | 8.2E+03                                            |
|               | CD49f <sup>+</sup> epidermal stem cells                       | 2.3                                   | 55.3                                  | 5.6 – 28.1                            | 2.0E+04                                            |
|               | murine embryonic fibroblasts (MEFs)                           | 8.6                                   | 210.2                                 | 21.3 – 106.7                          | 1.4E+04                                            |

|              |                                         |      |       |                 |         |
|--------------|-----------------------------------------|------|-------|-----------------|---------|
| <b>human</b> | BJ cell line                            | 32.1 | 782.4 | 79.4 –<br>397.1 | 2.4E+03 |
|              | HeLa cell line                          | 0.9  | 23.1  | 2.3 – 11.7      | 4.3E+03 |
|              | HEK293T<br>cell line                    | 0.6  | 15.8  | 1.6 – 8.0       | 4.4E+03 |
|              | CD3 <sup>+</sup> primary<br>T cells     | 0.5  | 13.4  | 1.4 – 6.8       | 5.4E+04 |
|              | CD19 <sup>+</sup><br>primary B<br>cells | 1.5  | 37.1  | 3.8 – 18.8      | 9.4E+03 |
|              | iPS cell line                           | 0.5  | 13.1  | 1.3 – 6.7       | 1.0E+05 |

690

691 **Table S1 RNaseH2 assay working range for different cell types.**

692 Columns show minimum, maximum and recommended amount of total protein for each cell  
693 type to achieve minimum (8.1 eqU), maximum (197 eqU) or optimal (> 20 eqU, < 100 eqU)  
694 substrate conversion rates. The approximate number of cells needed for a yield of 1 µg of  
695 total protein is shown on the right.

696



697 **Descriptions for supplemental figures**

698 **Figure S1 Age and gender of the healthy control group** (24 individuals with unknown  
699 RNASEH2 genotype). Median is shown, boxes indicate 25<sup>th</sup> and 75<sup>th</sup> percentile, whiskers  
700 indicate minimum and maximum.

701 **Figure S2 Influence of cell cycle phase on RNase H2 activity.**

702 FUCCI cell cycle reporter transgenic mice report cells in S / G2 / M phase of the cell cycle<sup>58</sup>.  
703 Total spleen cells of three FUCCI mice were isolated and stimulated in complete B cell  
704 medium for 48 hours with LPS (25 µg / ml) + IL-2 (180 U / ml), LPS (12.5 µg / ml) + IL-2 (180  
705 U / ml) + PMA (5 ng / ml) or left untreated. Between 1x10<sup>5</sup> and 2x10<sup>6</sup> FUCCI<sup>+</sup> and FUCCI-  
706 negative CD19<sup>+</sup> B cells per mouse were sorted by FACS using anti-murine CD19 (eBio1D3)  
707 PE antibodies and RNase H2 activity was measured in triplicates.

708 **A)** Fraction of FUCCI<sup>+</sup> cells upon stimulation.

709 **B)** RNase H2 activity normalized to cell number in B cells in S / G2 / M-phase (FUCCI<sup>+</sup>)  
710 versus FUCCI-negative B cells.

711 **C)** RNase H2 activity normalized to total cellular protein in B cells in S /G2 /M-phase  
712 (FUCCI<sup>+</sup>) versus FUCCI-negative B cells.

713 **D)** Amount of protein per cell in B cells in S /G2 /M-phase (FUCCI<sup>+</sup>) versus FUCCI<sup>-</sup> B cells.  
714 Cells stimulated with LPS and IL-2 possessed significantly more protein per cell than cells  
715 stimulated with LPS, IL-2 and PMA. FUCCI<sup>+</sup> cells possessed significantly more cellular  
716 protein per cell than FUCCI-negative cells. Increase of cellular protein from FUCCI-negative  
717 to FUCCI<sup>+</sup> cells was about 2.6-fold. Only stimulation with LPS + IL-2 significantly increased  
718 the amount of total cellular protein in FUCCI-negative cells.

719 Mean ± SD is shown, significance was tested via unpaired two tailed t-test, or 2-way ANOVA,  
720 as indicated in the graphs, \*\*\*\* p < 0.0001, \*\*\* p < 0.001, \*\* p < 0.01 \* p < 0.5, n.s. not  
721 significant.

## Figures:

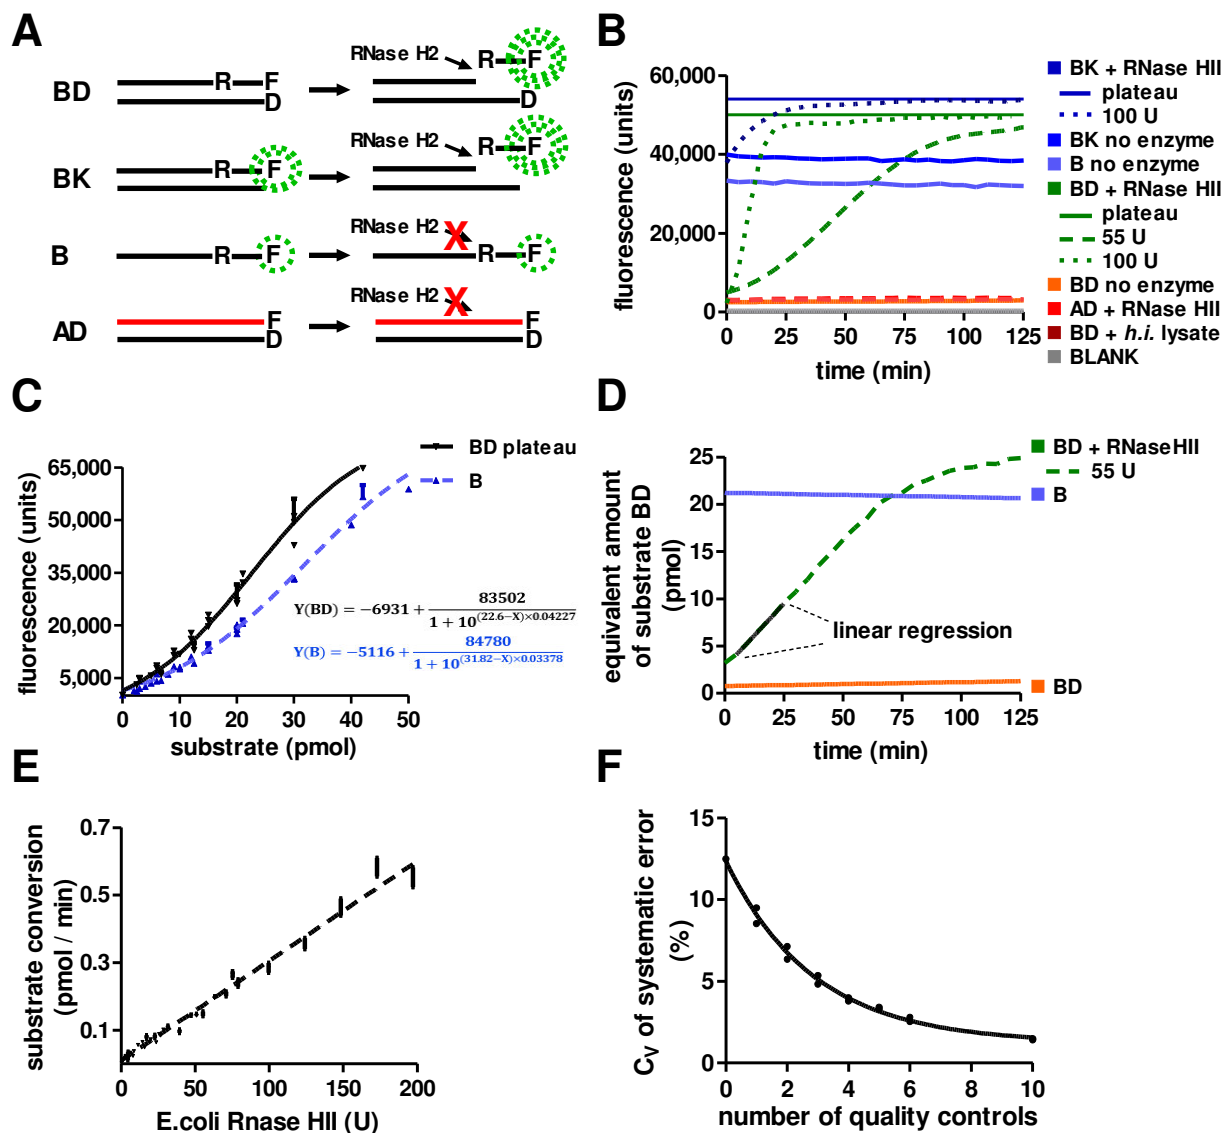

Figure 1

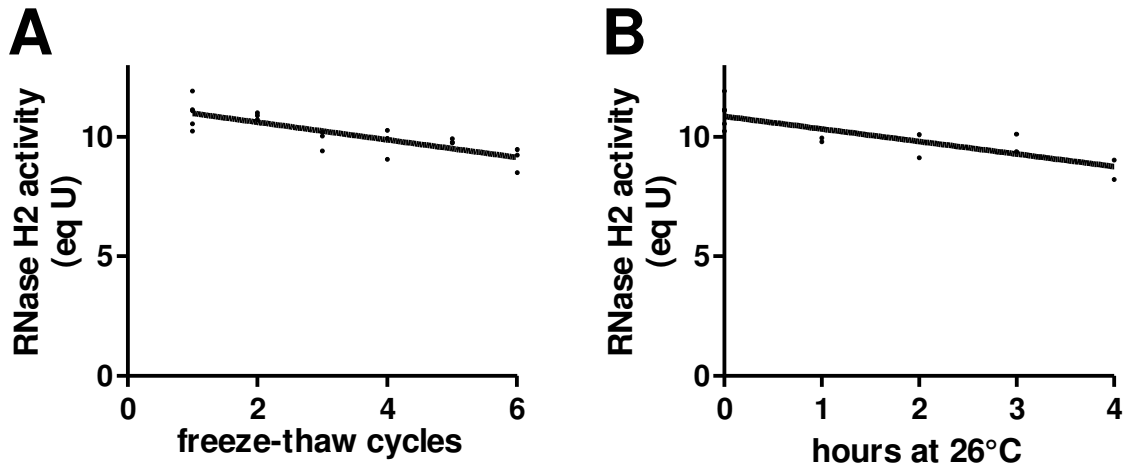

Figure 2

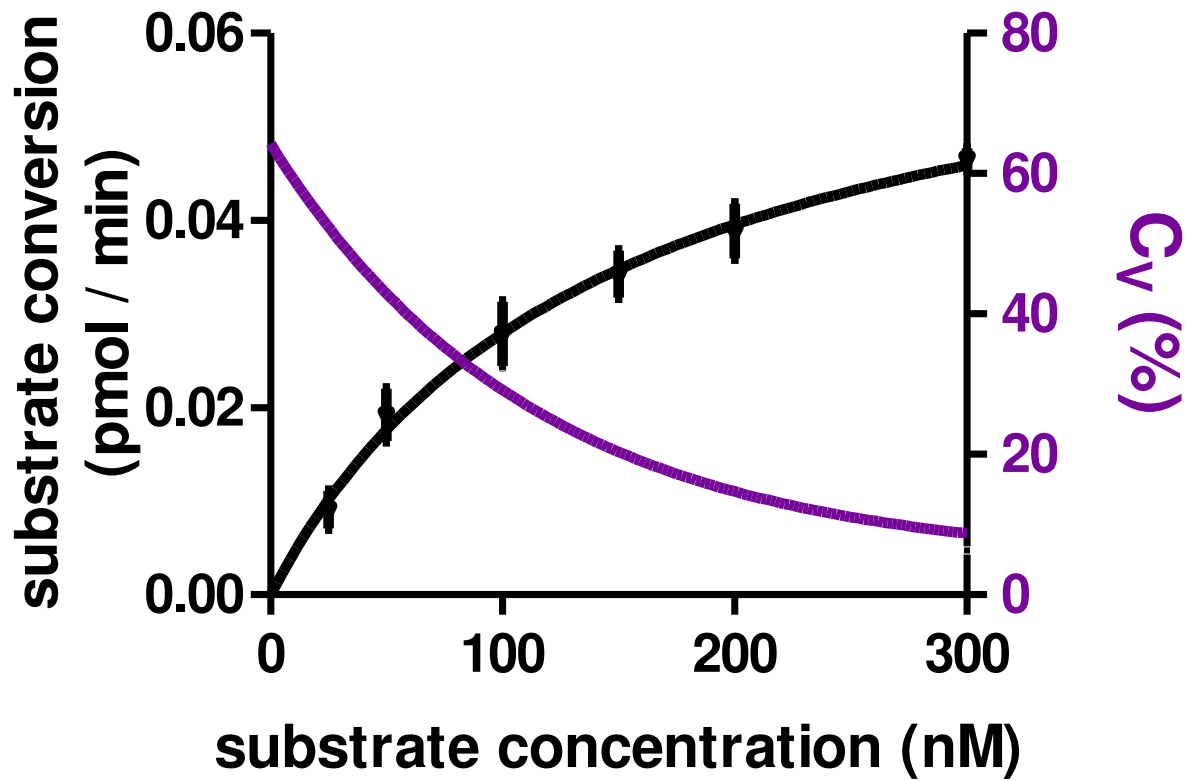

Figure 3

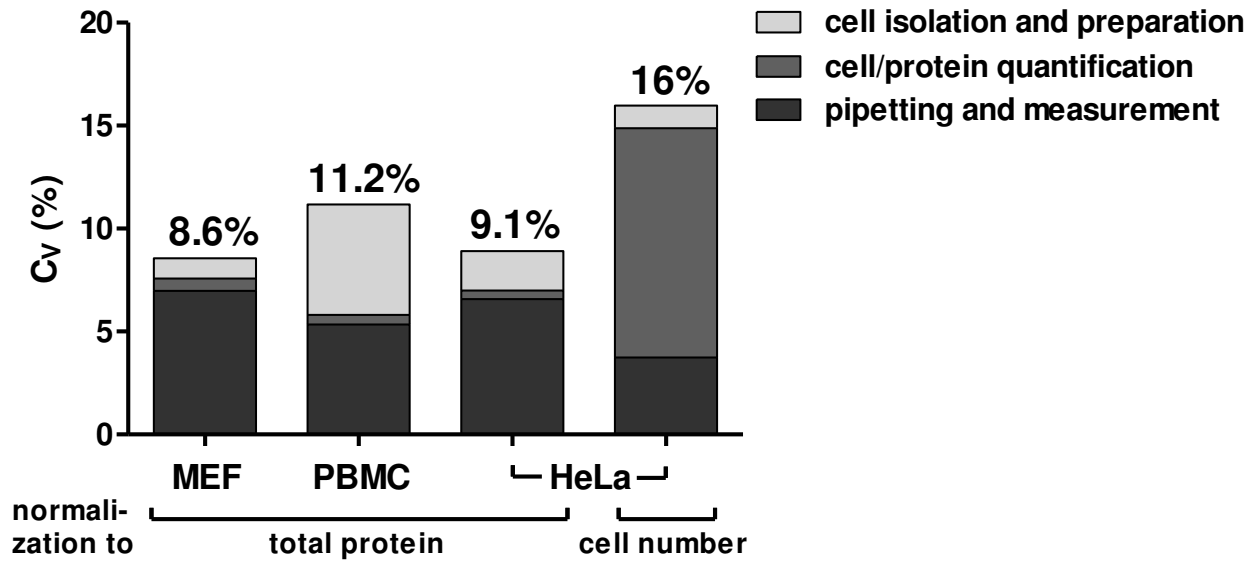

Figure 4

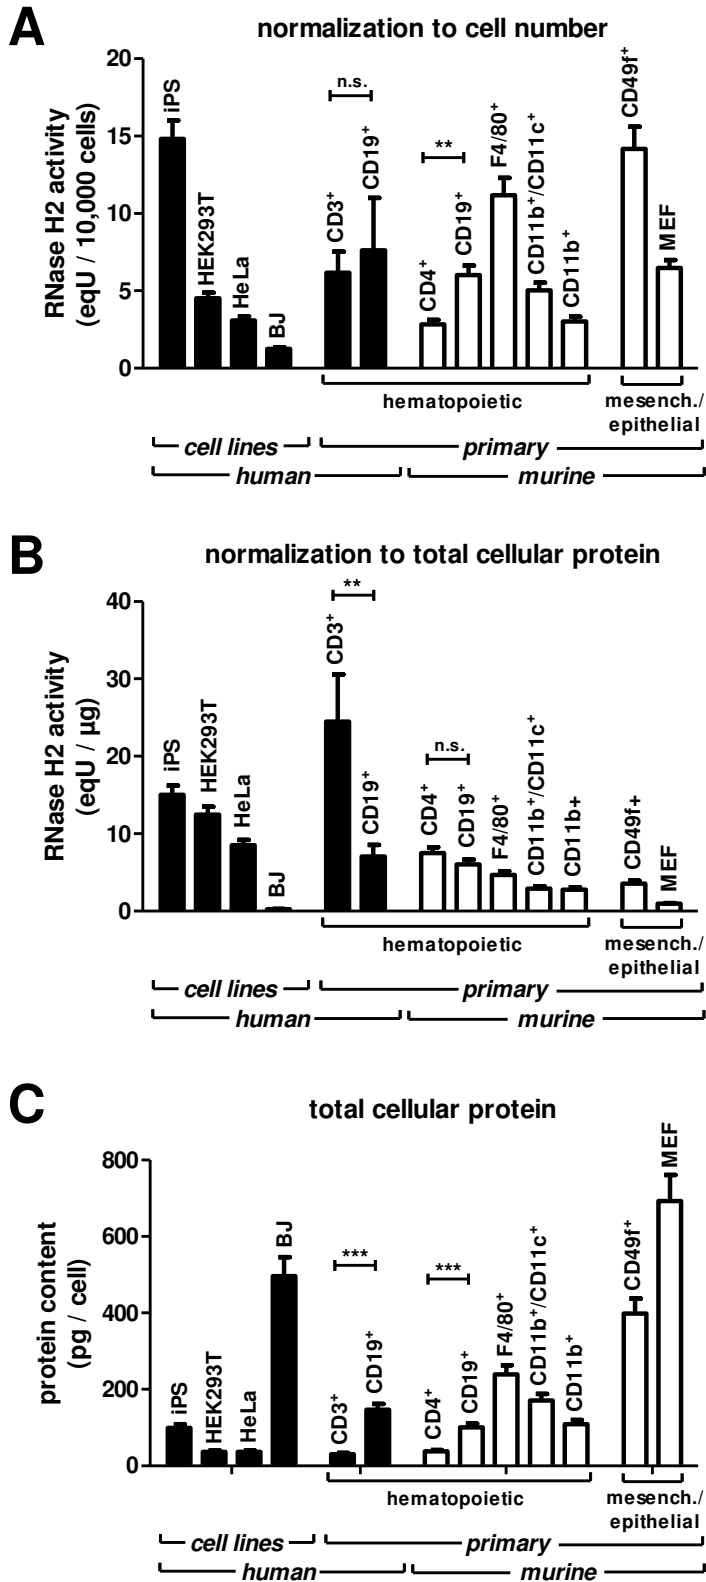

Figure 5

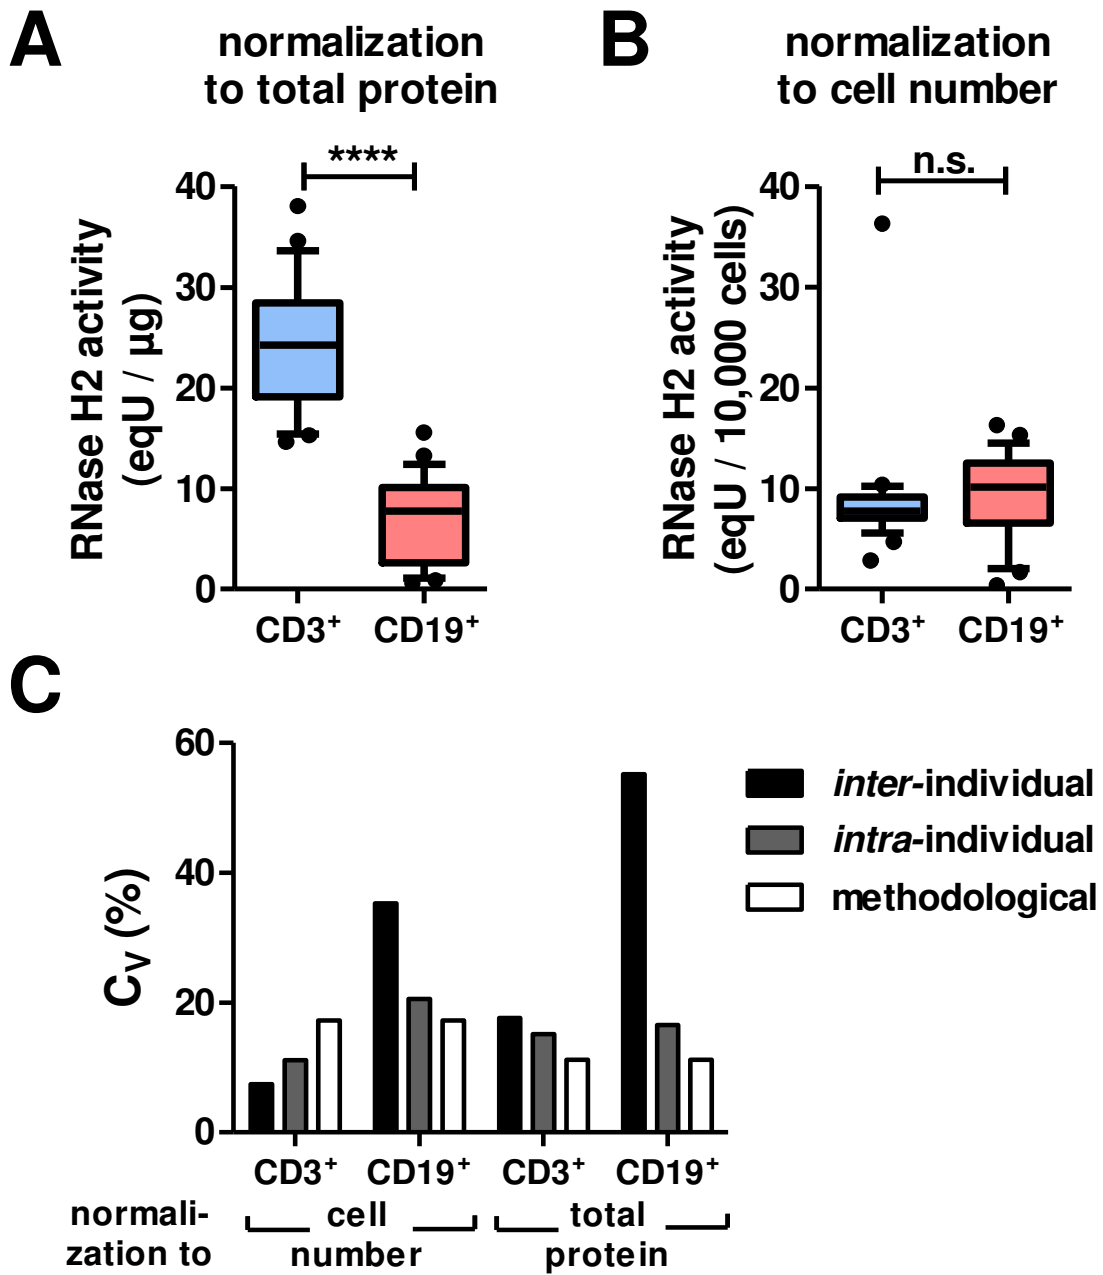

Figure 6

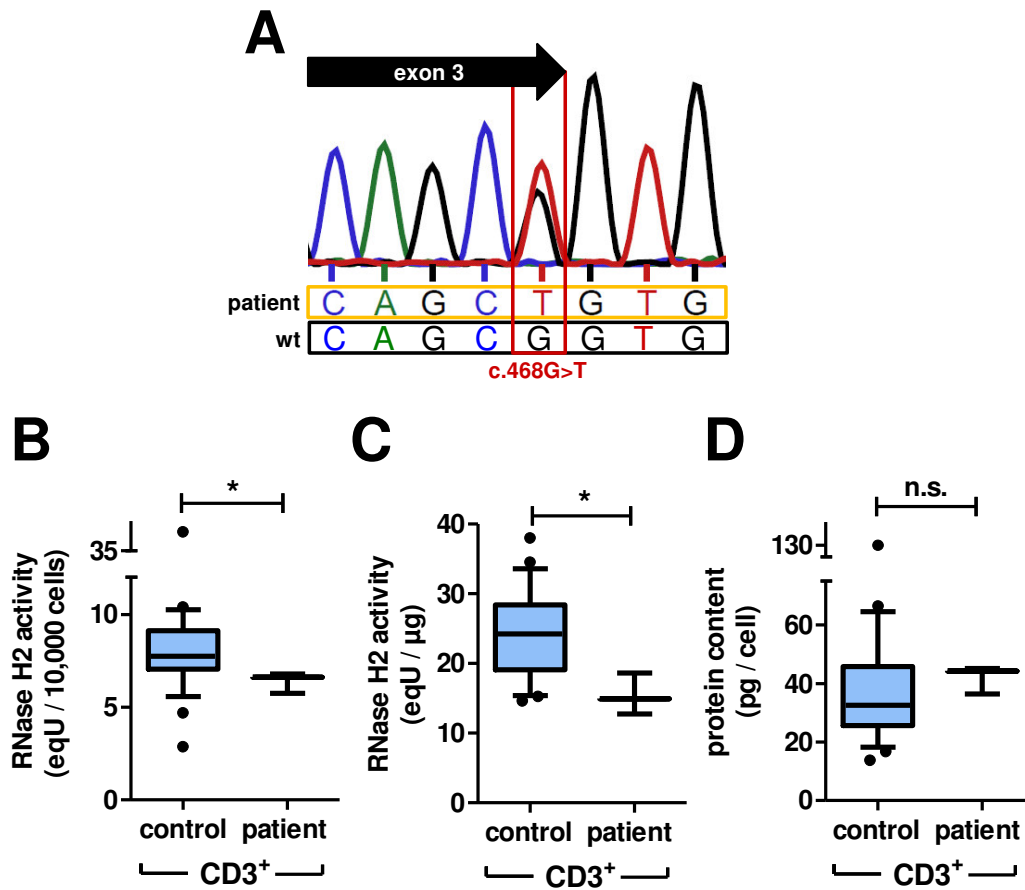

Figure 7



**Supplemental figures:**

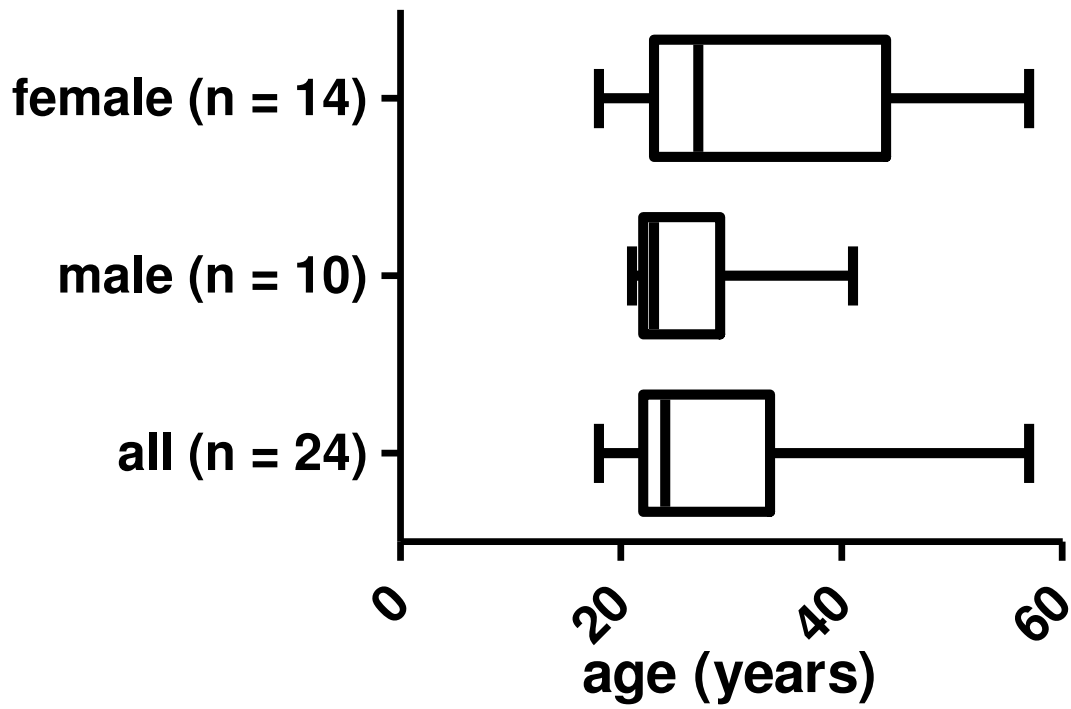

Figure S1

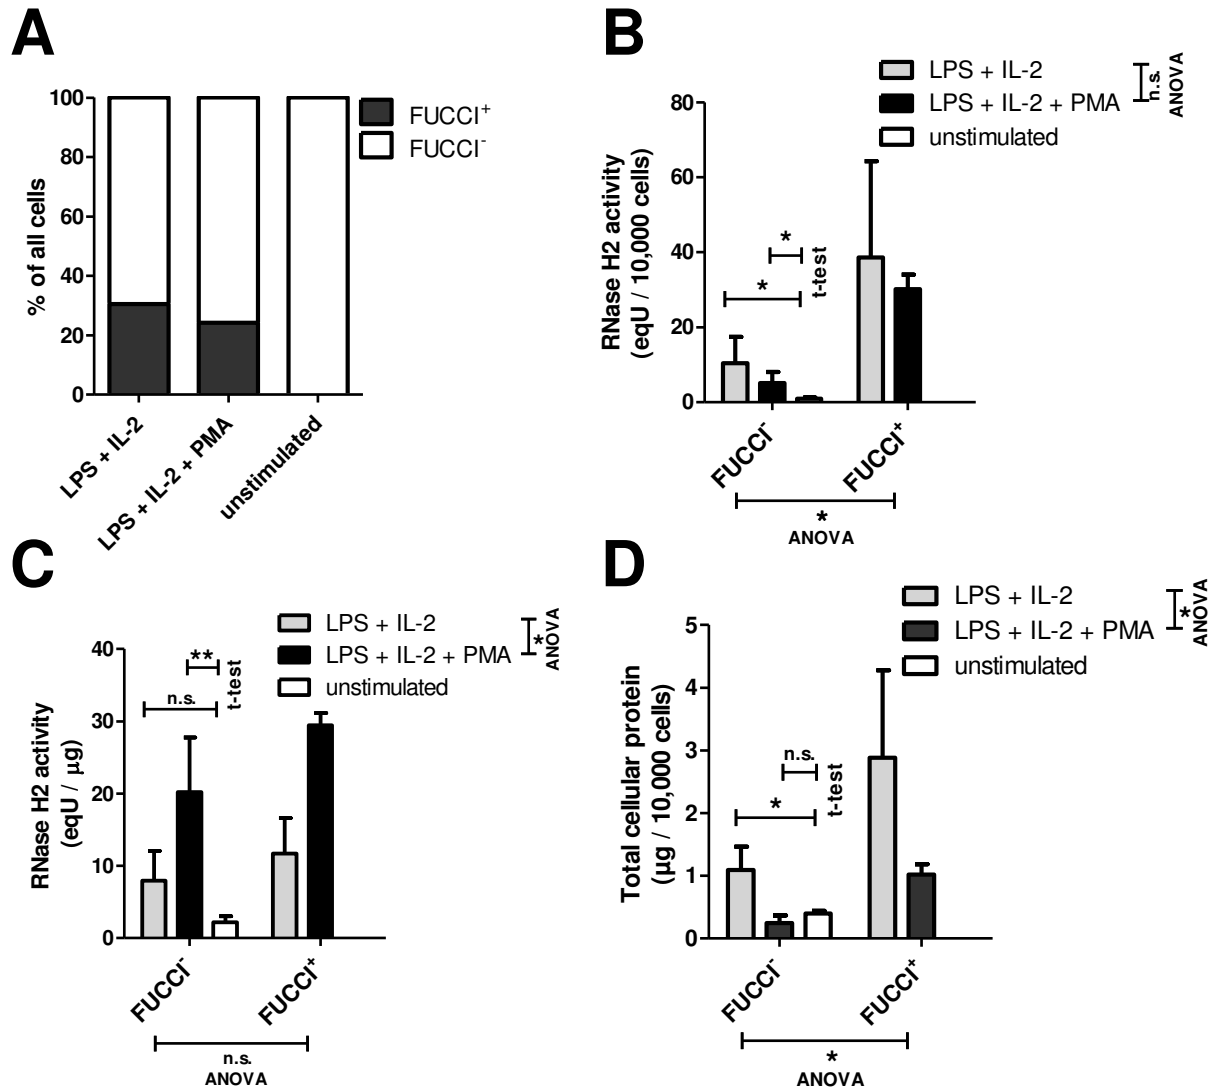

Figure S2
